# Supplementary material
Source: ML conference proceedings conference paper supplement (https://proceedings.neurips.cc/paper_files/paper/2023/hash/9ef237e007e26180ce4d16738efdf83f-Abstract.html)
Supplement: Supplementary file 1 [file 9ef237e007e26180ce4d16738efdf83f-Supplemental-Conference.zip]

Archive with 5 entries (5 files):
- supplementary_final/licence.pdf
- supplementary_final/readme.txt
- supplementary_final/rkhm_autoencoder.py
- supplementary_final/rkhm_classification.py
- supplementary_final/rkhm_regress.py
