# Supplementary material
Source: ML conference proceedings conference paper supplement (https://proceedings.neurips.cc/paper_files/paper/2023/hash/9ef237e007e26180ce4d16738efdf83f-Abstract.html)
Supplement: Supplementary file 1 [file 9ef237e007e26180ce4d16738efdf83f-Supplemental-Conference.zip › supplementary_final/rkhm_autoencoder.py]

# A demonstration script for deep RKHM autoencoder:
# "Deep Learning with Kernels through RKHM and the Perron-Frobenius Operator".

import numpy.random as nr
import tensorflow as tf
import tensorflow.keras
import numpy as np
import time

d=10 # We focus on the C*-algebra of d by d matrices and its C*-subalgebras
datanum=10 # number of training samples
tdatanum=1000 # number of test samples
epochs=4000 # number of epochs
c=0.001 # parameter in the Laplacian kernel
L=3 # number of the layers

dim=np.array([1,2,d]) # dimension of blocks for each layer


def tf_kron(a,b):
    a_shape = [a.shape[0],a.shape[1]]
    b_shape = [b.shape[0],b.shape[1]]
    return tf.reshape(tf.reshape(a,[a_shape[0],1,a_shape[1],1])*tf.reshape(b,[1,b_shape[0],1,b_shape[1]]),[a_shape[0]*b_shape[0],a_shape[1]*b_shape[1]])

def matchange(x,m,datanum,d):
    return tf.reshape(x,[1,datanum,m*d])

@tf.function
def opti(G,Gtmp,xdata,c1,opt,Gtest,xtestdata):
    with tf.GradientTape(persistent=True) as tape :
        tape.watch(c1)
        ydata=tf.matmul(G,c1[0])
        ytestdata=tf.matmul(Gtest,c1[0])

        for j in range(L-1):
            tmp1=matchange(ydata,d,datanum,d)
            tmp1test=matchange(ytestdata,d,tdatanum,d)
            for i in range(tdatanum-1):
                tmp1=tf.concat([tmp1,matchange(ydata,d,datanum,d)],axis=0)
            for i in range(datanum-1):
                tmp1test=tf.concat([tmp1test,matchange(ytestdata,d,tdatanum,d)],axis=0)

            GG=tf.math.exp(-c*tf.reduce_sum(abs(tf.transpose(tmp1[0:datanum,:,:],(1,0,2))-tmp1[0:datanum,:,:]),axis=2))
            GGtmp=GG
            GG=tf_kron(GG,tf.eye(d))
            GGtest=tf.math.exp(-c*tf.reduce_sum(abs(tf.transpose(tmp1test,(1,0,2))-tmp1),axis=2))
            GGtest=tf_kron(GGtest,tf.eye(d))
            ydata=tf.matmul(GG,c1[j+1])
            ytestdata=tf.matmul(GGtest,c1[j+1])

        loss=tf.norm(tf.matmul(tf.transpose(ydata-xdata,(1,0)),ydata-xdata),2)/datanum
        testloss=tf.norm(tf.matmul(tf.transpose(ytestdata-xtestdata,(1,0)),ytestdata-xtestdata),2)/tdatanum
        grad=tape.gradient(loss,c1)
        opt.apply_gradients(zip(grad, c1))
        return abs(testloss-loss)

if __name__ == '__main__':
    nr.seed(0)
    xdata=0.1*nr.randn(d,datanum)
    p=nr.randn(d*d,d)
    xdata=((0.1*p.dot(xdata))**2+0.0001*nr.randn(d*d,datanum)).reshape([d,datanum*d])
    xdata=tf.constant(xdata.T,dtype=tf.float32)
    
    xtestdata=0.1*nr.randn(d,tdatanum)
    xtestdata=((0.1*p.dot(xtestdata))**2).reshape([d,tdatanum*d])
    xtestdata=tf.constant(xtestdata.T,dtype=tf.float32)


    tmp1=matchange(xdata,d,datanum,d)
    tmp1test=matchange(xtestdata,d,tdatanum,d)
    for i in range(tdatanum-1):
        tmp1=tf.concat([tmp1,matchange(xdata,d,datanum,d)],axis=0)
    for i in range(datanum-1):
        tmp1test=tf.concat([tmp1test,matchange(xtestdata,d,tdatanum,d)],axis=0)

    G=tf.math.exp(-c*tf.reduce_sum(abs(tf.transpose(tmp1[0:datanum,:,:],(1,0,2))-tmp1[0:datanum,:,:]),axis=2))
    Gtmp=G
    G=tf_kron(G,tf.eye(d))
    Gtest=tf.math.exp(-c*tf.reduce_sum(abs(tf.transpose(tmp1test,(1,0,2))-tmp1),axis=2))
    Gtest=tf_kron(Gtest,tf.eye(d))

    nr.seed(int(time.time()))
    
    c1=[]
    for k in range(L):
        c1.append(np.zeros((datanum*d,d)))
        for i in range(datanum):
            for j in range(int(d/dim[k])):
                c1[k][i*dim[k]:(i+1)*dim[k],j*dim[k]:(j+1)*dim[k]]=0.1*np.ones((dim[k],dim[k]))+0.05*nr.randn(dim[k],dim[k])    
        c1[k]=tf.Variable(c1[k],dtype=tf.float32)

    opt = tf.keras.optimizers.SGD(1e-4)
    
    for epoch in range(1,epochs+1,1):
        error=opti(G,Gtmp,xdata,c1,opt,Gtest,xtestdata)
        if epoch%10==0:
            print(epoch,"Generalization Error: ",error.numpy(),flush=True)
