# Supplementary material
Source: ML conference proceedings conference paper supplement (https://proceedings.neurips.cc/paper_files/paper/2023/hash/9ef237e007e26180ce4d16738efdf83f-Abstract.html)
Supplement: Supplementary file 1 [file 9ef237e007e26180ce4d16738efdf83f-Supplemental-Conference.zip › supplementary_final/rkhm_classification.py]

# A demonstration script for classification with MNIST:
# "Deep Learning with Kernels through RKHM and the Perron-Frobenius Operator".

import numpy.random as nr
import tensorflow as tf
from tensorflow.keras import layers, models
from tensorflow.keras.models import Model
import numpy as np
import idx2numpy

d=28 # We focus on the C*-algebra of d by d matrices and its C*-subalgebras
datanum=20 # number of training samples
fnum=20 # number of samples used to construct the represntation space
tdatanum=1000 # number of test samples
epochs=1000 # number of epochs
c=0.001 # parameter in the Laplacian kernel
L=2 # number of the layers
lam1=1 # Perron-Frobenius regularlization parameter
lam2=0.001 # regularlization parameter for ||f_L||
dim=np.array([7,4]) # dimension of blocks for each layer
dim1=np.array([2,4]) # dimension of blocks of the parameter a_j for each layer j

ind=np.arange(0,fnum,1,dtype=np.int32)

a=[]
j=0
for j in range(L):
    a.append(np.zeros((d,d)))
    for i in range(int(d/dim1[j])):
        a[j][dim1[j]*i:dim1[j]*(i+1),dim1[j]*i:dim1[j]*(i+1)]=np.ones((dim1[j],dim1[j]))
    a[j]=tf.constant(a[j],tf.float32)


class NN(Model):
  def __init__(self,dim):
    super(NN, self).__init__()    
    self.model = models.Sequential()
    self.model.add(layers.Dense(84, activation='sigmoid'))
    self.model.add(layers.Dense(10,activation='softmax'))
  
  def call(self, x):
    output = self.model(x)
    
    return output


def tf_kron(a,b):
    a_shape = [a.shape[0],a.shape[1]]
    b_shape = [b.shape[0],b.shape[1]]
    return tf.reshape(tf.reshape(a,[a_shape[0],1,a_shape[1],1])*tf.reshape(b,[1,b_shape[0],1,b_shape[1]]),[a_shape[0]*b_shape[0],a_shape[1]*b_shape[1]])
    
@tf.function
def opti(label,c1,dense,opt,xtestdata,G,Gtest,Gtmp):
    with tf.GradientTape(persistent=True) as tape :
        tape.watch([c1,dense.trainable_variables])
        
        ydata=tf.matmul(G,c1[0])
        ytestdata=tf.matmul(Gtest,c1[0])
        Gpre=[]
        GGtmp=tf.gather(Gtmp,indices=ind)
        Gpre.append(GGtmp)
        
        features=ydata[ind[0]*d:(ind[0]+1)*d,:]
        for i in range(fnum-1):
            features=tf.concat([features,ydata[ind[i+1]*d:(ind[i+1]+1)*d,:]],axis=0)
            
        for j in range(0,L-1,1):
            if j>=0:
                mdim=dim[j]
            ytmp=tf.matmul(ydata,a[j+1])
            ytesttmp=tf.matmul(ytestdata,a[j+1])
            ftmp=tf.matmul(features,a[j+1])
            tmp1=tf.reshape(ytmp,[1,datanum,d*d])
            tmp1test=tf.reshape(ytesttmp,[1,tdatanum,d*d])
            tmpf=tf.reshape(ftmp,[1,fnum,d*d])
            for i in range(fnum-1):
                tmp1=tf.concat([tmp1,tf.reshape(ytmp,[1,datanum,d*d])],axis=0)
            for i in range(fnum-1):
                tmp1test=tf.concat([tmp1test,tf.reshape(ytesttmp,[1,tdatanum,d*d])],axis=0)
            for i in range(tdatanum-1):
                tmpf=tf.concat([tmpf,tf.reshape(ftmp,[1,fnum,d*d])],axis=0)
                
            GG=tf.math.exp(-c*tf.reduce_sum(abs(tf.transpose(tmp1,(1,0,2))-tmpf[0:datanum,:,:]),axis=2))
            GGtmp=tf.gather(GG,indices=ind)
            GG=tf_kron(GG,tf.eye(d))*tf.matmul(ydata,tf.transpose(features,(1,0)))

            
            Gpre.append(GGtmp)
            GGtest=tf.math.exp(-c*tf.reduce_sum(abs(tf.transpose(tmp1test,(1,0,2))-tmpf),axis=2))
            GGtest=tf_kron(GGtest,tf.eye(d))*tf.matmul(ytestdata,tf.transpose(features,(1,0)))
            
            ydata=tf.matmul(GG,c1[j+1])
            ytestdata=tf.matmul(GGtest,c1[j+1])
            features=ydata[ind[0]*d:(ind[0]+1)*d,:]
            for i in range(fnum-1):
                features=tf.concat([features,ydata[ind[i+1]*d:(ind[i+1]+1)*d,:]],axis=0)

        ydata=dense.call(tf.reshape(ydata,[datanum,d*d]))
        ytestdata=dense.call(tf.reshape(ytestdata,[tdatanum,d*d]))

        reg1=lam1*(tf.norm(Gpre[L-1],2)+tf.norm(tf.linalg.solve(0.01*tf.eye(fnum)+Gpre[L-1],tf.eye(fnum)),2))
        reg2=lam2*tf.norm(tf.matmul(tf.matmul(tf.transpose(c1[L-1],(1,0)),tf_kron(GGtmp,tf.eye(d))),c1[L-1]),2)

        reg=reg1+reg2
        
        loss=tf.norm(tf.matmul(tf.transpose(ydata-tf.math.real(label),(1,0)),ydata-tf.math.real(label)),2)/datanum
        lossreg=loss+reg

        indx=tf.math.argmax(ydata,axis=1)
        indx1=tf.math.argmax(label,axis=1)
        acc=1-tf.math.count_nonzero(indx-indx1)/len(indx)

        indx=tf.math.argmax(ytestdata,axis=1)
        indx1=tf.math.argmax(labeltest,axis=1)
        acctest=1-tf.math.count_nonzero(indx-indx1)/len(indx)
        
        grad=tape.gradient(lossreg,c1)
        opt.apply_gradients(zip(grad, c1))
        grad=tape.gradient(lossreg,dense.trainable_variables)
        opt.apply_gradients(zip(grad, dense.trainable_variables))

        return acc,acctest

if __name__ == '__main__':
    
    ydata=idx2numpy.convert_from_file('./train-images.idx3-ubyte')/255
    label= idx2numpy.convert_from_file('./train-labels.idx1-ubyte')
    
    xmat=np.zeros((datanum,d,d))
    features=np.zeros((fnum,d,d))
        
    xmat=ydata[0:datanum,:,:]
        
    label2=np.zeros((len(label),10))
    index=[[] for i in range(10)]
    for i in range(10):
        index[i]=list(np.where(label==i))[0]
        label2[index[i],i]=np.ones(len(index[i]))

    ymat=label2[0:datanum,:]
    label=tf.constant(ymat,dtype=tf.float32)

    for i in range(fnum):
        features[i,:,:]=xmat[ind[i],:,:]
    features=tf.constant(features,dtype=tf.float32)
    
    xdata=tf.constant(xmat,dtype=tf.float32)

    xtest=ydata[datanum:datanum+tdatanum,:,:]
    labeltest=label2[datanum:datanum+tdatanum,:]
    
    xtestdata=tf.constant(xtest,dtype=tf.float32)
    labeltest=tf.constant(labeltest,dtype=tf.float32)

    ydata=tf.reshape(xdata,[datanum*d,d])
    ytestdata=tf.reshape(xtestdata,[tdatanum*d,d])
    features=ydata[ind[0]*d:(ind[0]+1)*d,:]
    for i in range(fnum-1):
        features=tf.concat([features,ydata[ind[i+1]*d:(ind[i+1]+1)*d,:]],axis=0)

        
    ytmp=tf.matmul(ydata,a[0])
    ytesttmp=tf.matmul(ytestdata,a[0])
    ftmp=tf.matmul(features,a[0])
    tmp1=tf.reshape(ytmp,[1,datanum,d*d])
    tmp1test=tf.reshape(ytesttmp,[1,tdatanum,d*d])
    tmpf=tf.reshape(ftmp,[1,fnum,d*d])
    for i in range(fnum-1):
        tmp1=tf.concat([tmp1,tf.reshape(ytmp,[1,datanum,d*d])],axis=0)
    for i in range(fnum-1):
        tmp1test=tf.concat([tmp1test,tf.reshape(ytesttmp,[1,tdatanum,d*d])],axis=0)
    for i in range(tdatanum-1):
        tmpf=tf.concat([tmpf,tf.reshape(ftmp,[1,fnum,d*d])],axis=0)

    G=tf.math.exp(-c*tf.reduce_sum(abs(tf.transpose(tmp1,(1,0,2))-tmpf[0:datanum,:,:]),axis=2))
    Gtmp=tf.gather(G,indices=ind)

    Gtest=tf.math.exp(-c*tf.reduce_sum(abs(tf.transpose(tmp1test,(1,0,2))-tmpf),axis=2))
    G=tf_kron(G,tf.eye(d))*tf.matmul(ydata,tf.transpose(features,(1,0)))
    Gtest=tf_kron(Gtest,tf.eye(d))*tf.matmul(ytestdata,tf.transpose(features,(1,0)))
    
    c1=[]
    for j in range(L):
        c1.append(np.zeros((d*fnum,d)))
    
    for k in range(L):
        for i in range(fnum):
            for j in range(int(d/dim[k])):
                c1[k][i*d+j*dim[k]:i*d+(j+1)*dim[k],j*dim[k]:(j+1)*dim[k]]=0.1*nr.randn(dim[k],dim[k])

    for j in range(L):   
        c1[j]=tf.Variable(c1[j],dtype=tf.float32)

    dense = NN(d)
    dense.model(tf.zeros((1,d*d), dtype=tf.float32))
    opt = tf.keras.optimizers.Adam(1e-3)
    
    for epoch in range(1,epochs+1,1):
        acc,acctest=opti(label,c1,dense,opt,labeltest,G,Gtest,Gtmp)
        print(epoch,"Training accuracy:", acc.numpy(),"Test accuracy:", acctest.numpy(),flush=True)
            
